# Supplementary material
Source: publisher figshare collection journal article supplement (https://acs.figshare.com/ndownloader/files/3960115)
Supplement: Supplementary file 1 [file 3960115]

 
data_mm215 
  
_audit_creation_method            SHELXL-97 
_chemical_name_systematic 
; 
 ? 
; 
_chemical_name_common             ? 
_chemical_melting_point           ? 
_chemical_formula_moiety          ? 
_chemical_formula_sum 
 'C19 H21 N4 O5 S2 Yb' 
_chemical_formula_weight          622.56 
  
loop_ 
 _atom_type_symbol 
 _atom_type_description 
 _atom_type_scat_dispersion_real 
 _atom_type_scat_dispersion_imag 
 _atom_type_scat_source 
 'C'  'C'   0.0033   0.0016 
 'International Tables Vol C Tables 4.2.6.8 and 6.1.1.4' 
 'H'  'H'   0.0000   0.0000 
 'International Tables Vol C Tables 4.2.6.8 and 6.1.1.4' 
 'N'  'N'   0.0061   0.0033 
 'International Tables Vol C Tables 4.2.6.8 and 6.1.1.4' 
 'O'  'O'   0.0106   0.0060 
 'International Tables Vol C Tables 4.2.6.8 and 6.1.1.4' 
 'S'  'S'   0.1246   0.1234 
 'International Tables Vol C Tables 4.2.6.8 and 6.1.1.4' 
 'Yb'  'Yb'  -0.3850   5.5486 
 'International Tables Vol C Tables 4.2.6.8 and 6.1.1.4' 
  
_symmetry_cell_setting            Triclinic 
_symmetry_space_group_name_H-M    P-1 
  
loop_ 
 _symmetry_equiv_pos_as_xyz 
 'x, y, z' 
 '-x, -y, -z' 
  
_cell_length_a                    9.7648(2) 
_cell_length_b                    10.3240(2) 
_cell_length_c                    11.8846(2) 
_cell_angle_alpha                 97.2840(10) 
_cell_angle_beta                  94.6080(10) 
_cell_angle_gamma                 102.8900(10) 
_cell_volume                      1151.16(4) 
_cell_formula_units_Z             2 
_cell_measurement_temperature     200(2) 
_cell_measurement_reflns_used     9941 
_cell_measurement_theta_min       2.48 
_cell_measurement_theta_max       28.45 
  
_exptl_crystal_description        block 
_exptl_crystal_colour             colourless 
_exptl_crystal_size_max           0.14 
_exptl_crystal_size_mid           0.12 
_exptl_crystal_size_min           0.09 
_exptl_crystal_density_meas       n/a 
_exptl_crystal_density_diffrn     1.796 
_exptl_crystal_density_method     'not measured' 
_exptl_crystal_F_000              610 
_exptl_absorpt_coefficient_mu     4.280 
_exptl_absorpt_correction_type    multi-scan 
_exptl_absorpt_correction_T_min   0.5856 
_exptl_absorpt_correction_T_max   0.6993 
_exptl_absorpt_process_details    'SADABS, Bruker (2003)' 
  
_exptl_special_details 
; 
 Data collection is performed with four batch runs at phi = 0.00 deg 
 (600 frames), at phi = 90.00 deg (600 frames), at phi = 180.00 deg 
 (600 frames), and at phi = 270.00 deg (600 frames). 
 A fifth batch run is collected at phi = 0.00 deg (50 frames) to monitor 
 crystal and diffractometer stability. Frame width = 0.30 deg in omega. 
 Data is merged, corrected for decay (if any), and treated with multi-scan 
 absorption corrections (if required). All symmetry-equivalent reflections 
 are merged for centrosymmetric data. 
 Friedel pairs are not merged for noncentrosymmetric data. 
; 
  
_diffrn_ambient_temperature       200(2) 
_diffrn_radiation_wavelength      0.71073 
_diffrn_radiation_type            MoK\a 
_diffrn_radiation_source          'fine-focus sealed tube' 
_diffrn_radiation_monochromator   graphite 
_diffrn_measurement_device_type   'Bruker APEX-II CCD' 
_diffrn_measurement_method        '\f and \w scans' 
_diffrn_detector_area_resol_mean  ? 
_diffrn_reflns_number             11608 
_diffrn_reflns_av_R_equivalents   0.0112 
_diffrn_reflns_av_sigmaI/netI     0.0150 
_diffrn_reflns_limit_h_min        -13 
_diffrn_reflns_limit_h_max        13 
_diffrn_reflns_limit_k_min        -13 
_diffrn_reflns_limit_k_max        13 
_diffrn_reflns_limit_l_min        -15 
_diffrn_reflns_limit_l_max        15 
_diffrn_reflns_theta_min          1.74 
_diffrn_reflns_theta_max          28.45 
_reflns_number_total              5642 
_reflns_number_gt                 5434 
_reflns_threshold_expression      >2sigma(I) 
  
_computing_data_collection        'APEX II, Bruker (2009)' 
_computing_cell_refinement        'APEX II, Bruker (2009)' 
_computing_data_reduction         'XPREP, Bruker (2009)' 
_computing_structure_solution     'SHELXS-97 (Sheldrick, 2008)' 
_computing_structure_refinement   'SHELXL-97 (Sheldrick, 2008)' 
_computing_molecular_graphics     'SHELXTL, Bruker (2004)' 
_computing_publication_material   'SHELXTL, Bruker (2004)' 
  
_refine_special_details 
; 
 Refinement of F^2^ against ALL reflections.  The weighted R-factor wR and 
 goodness of fit S are based on F^2^, conventional R-factors R are based 
 on F, with F set to zero for negative F^2^. The threshold expression of 
 F^2^ > 2sigma(F^2^) is used only for calculating R-factors(gt) etc. and is 
 not relevant to the choice of reflections for refinement.  R-factors based 
 on F^2^ are statistically about twice as large as those based on F, and R- 
 factors based on ALL data will be even larger. 
; 
  
_refine_ls_structure_factor_coef  Fsqd 
_refine_ls_matrix_type            full 
_refine_ls_weighting_scheme       calc 
_refine_ls_weighting_details 
 'calc w=1/[\s^2^(Fo^2^)+(0.0249P)^2^+0.2604P] where P=(Fo^2^+2Fc^2^)/3' 
_atom_sites_solution_primary      direct 
_atom_sites_solution_secondary    difmap 
_atom_sites_solution_hydrogens    geom 
_refine_ls_hydrogen_treatment     constr 
_refine_ls_extinction_method      none 
_refine_ls_extinction_coef        ? 
_refine_ls_number_reflns          5642 
_refine_ls_number_parameters      280 
_refine_ls_number_restraints      0 
_refine_ls_R_factor_all           0.0151 
_refine_ls_R_factor_gt            0.0143 
_refine_ls_wR_factor_ref          0.0379 
_refine_ls_wR_factor_gt           0.0374 
_refine_ls_goodness_of_fit_ref    1.032 
_refine_ls_restrained_S_all       1.032 
_refine_ls_shift/su_max           0.002 
_refine_ls_shift/su_mean          0.000 
  
loop_ 
 _atom_site_label 
 _atom_site_type_symbol 
 _atom_site_fract_x 
 _atom_site_fract_y 
 _atom_site_fract_z 
 _atom_site_U_iso_or_equiv 
 _atom_site_adp_type 
 _atom_site_occupancy 
 _atom_site_symmetry_multiplicity 
 _atom_site_calc_flag 
 _atom_site_refinement_flags 
 _atom_site_disorder_assembly 
 _atom_site_disorder_group 
Yb1 Yb 0.673832(6) 0.580925(6) 0.577384(5) 0.01967(3) Uani 1 1 d . . . 
N1 N 0.71615(15) 0.48118(15) 0.75107(12) 0.0231(3) Uani 1 1 d . . . 
N2 N 0.81800(16) 0.56740(15) 0.83176(12) 0.0262(3) Uani 1 1 d . . . 
H2A H 0.8316 0.5514 0.9023 0.031 Uiso 1 1 calc R . . 
N4 N 0.55023(17) 0.66308(17) 0.72190(14) 0.0314(3) Uani 1 1 d . . . 
N3 N 0.81618(18) 0.64940(18) 0.43599(14) 0.0342(3) Uani 1 1 d . . . 
O1 O 0.49769(12) 0.39559(12) 0.55781(10) 0.0220(2) Uani 1 1 d . . . 
O2 O 0.32871(14) 0.18586(13) 0.43721(11) 0.0292(3) Uani 1 1 d . . . 
O3 O 0.87088(13) 0.69360(13) 0.69422(10) 0.0285(3) Uani 1 1 d . . . 
O4 O 0.79182(15) 0.41077(15) 0.52891(11) 0.0331(3) Uani 1 1 d . . . 
H5B H 0.8253 0.3735 0.5799 0.050 Uiso 1 1 calc R . . 
O6 O 0.77193(19) 0.51591(17) 0.05229(13) 0.0456(4) Uani 1 1 d . . . 
H6A H 0.7401 0.4377 0.0663 0.068 Uiso 1 1 calc R . . 
S1 S 0.41745(6) 0.77001(6) 0.89831(5) 0.04014(12) Uani 1 1 d . . . 
S2 S 1.03815(6) 0.73366(7) 0.30915(6) 0.04909(14) Uani 1 1 d . . . 
C1 C 0.47913(17) 0.28158(16) 0.60377(14) 0.0216(3) Uani 1 1 d . . . 
C2 C 0.38502(18) 0.16602(17) 0.54192(15) 0.0250(3) Uani 1 1 d . . . 
C3 C 0.3516(2) 0.04590(19) 0.58420(18) 0.0344(4) Uani 1 1 d . . . 
H3A H 0.2876 -0.0298 0.5401 0.041 Uiso 1 1 calc R . . 
C4 C 0.4124(2) 0.0364(2) 0.69211(18) 0.0370(4) Uani 1 1 d . . . 
H4A H 0.3890 -0.0455 0.7226 0.044 Uiso 1 1 calc R . . 
C5 C 0.5063(2) 0.14618(19) 0.75404(16) 0.0314(4) Uani 1 1 d . . . 
H5A H 0.5472 0.1394 0.8277 0.038 Uiso 1 1 calc R . . 
C6 C 0.54355(18) 0.26891(17) 0.71092(14) 0.0243(3) Uani 1 1 d . . . 
C7 C 0.2474(2) 0.0694(2) 0.36222(18) 0.0391(5) Uani 1 1 d . . . 
H7A H 0.2134 0.0964 0.2910 0.059 Uiso 1 1 calc R . . 
H7B H 0.1665 0.0264 0.3990 0.059 Uiso 1 1 calc R . . 
H7C H 0.3068 0.0059 0.3455 0.059 Uiso 1 1 calc R . . 
C8 C 0.65038(18) 0.37323(18) 0.78296(14) 0.0254(3) Uani 1 1 d . . . 
H8A H 0.6730 0.3602 0.8593 0.030 Uiso 1 1 calc R . . 
C9 C 0.89394(18) 0.67582(18) 0.79603(15) 0.0251(3) Uani 1 1 d . . . 
C10 C 1.00320(18) 0.77427(18) 0.87597(15) 0.0256(3) Uani 1 1 d . . . 
C11 C 1.1415(2) 0.8572(2) 1.05771(17) 0.0379(4) Uani 1 1 d . . . 
H11A H 1.1669 0.8459 1.1341 0.045 Uiso 1 1 calc R . . 
C12 C 1.2064(2) 0.9725(2) 1.01714(18) 0.0371(4) Uani 1 1 d . . . 
H12A H 1.2754 1.0404 1.0658 0.045 Uiso 1 1 calc R . . 
C13 C 1.1709(2) 0.9892(2) 0.90604(19) 0.0379(4) Uani 1 1 d . . . 
H13A H 1.2158 1.0684 0.8781 0.045 Uiso 1 1 calc R . . 
C14 C 1.0699(2) 0.8906(2) 0.83506(17) 0.0327(4) Uani 1 1 d . . . 
H14A H 1.0459 0.9021 0.7585 0.039 Uiso 1 1 calc R . . 
C15 C 0.49542(19) 0.70577(18) 0.79628(15) 0.0257(3) Uani 1 1 d . . . 
C16 C 0.90783(19) 0.68501(19) 0.38359(15) 0.0282(3) Uani 1 1 d . . . 
C17 C 0.8089(3) 0.3454(3) 0.41870(19) 0.0469(5) Uani 1 1 d . . . 
H17A H 0.7634 0.3843 0.3592 0.070 Uiso 1 1 calc R . . 
H17B H 0.7651 0.2492 0.4114 0.070 Uiso 1 1 calc R . . 
H17C H 0.9098 0.3582 0.4103 0.070 Uiso 1 1 calc R . . 
C18 C 0.6929(3) 0.6031(3) 0.1025(3) 0.0576(6) Uani 1 1 d . . . 
H18A H 0.7538 0.6690 0.1630 0.086 Uiso 1 1 calc R . . 
H18B H 0.6134 0.5507 0.1351 0.086 Uiso 1 1 calc R . . 
H18C H 0.6569 0.6500 0.0442 0.086 Uiso 1 1 calc R . . 
C30 C 1.0396(2) 0.7576(2) 0.98794(16) 0.0312(4) Uani 1 1 d . . . 
H30A H 0.9951 0.6788 1.0165 0.037 Uiso 1 1 calc R . . 
  
loop_ 
 _atom_site_aniso_label 
 _atom_site_aniso_U_11 
 _atom_site_aniso_U_22 
 _atom_site_aniso_U_33 
 _atom_site_aniso_U_23 
 _atom_site_aniso_U_13 
 _atom_site_aniso_U_12 
Yb1 0.01770(4) 0.02233(4) 0.01808(4) 0.00401(3) 0.00356(2) 0.00175(3) 
N1 0.0214(6) 0.0266(7) 0.0197(6) 0.0024(5) 0.0021(5) 0.0035(5) 
N2 0.0257(7) 0.0291(7) 0.0203(6) 0.0046(6) -0.0010(5) -0.0001(6) 
N4 0.0338(8) 0.0324(8) 0.0308(8) 0.0065(6) 0.0115(6) 0.0096(7) 
N3 0.0294(8) 0.0429(9) 0.0337(8) 0.0142(7) 0.0121(6) 0.0080(7) 
O1 0.0219(5) 0.0209(5) 0.0227(5) 0.0057(4) 0.0020(4) 0.0024(4) 
O2 0.0357(7) 0.0222(6) 0.0242(6) 0.0015(5) -0.0023(5) -0.0016(5) 
O3 0.0246(6) 0.0343(7) 0.0233(6) 0.0066(5) 0.0016(5) -0.0010(5) 
O4 0.0356(7) 0.0407(8) 0.0279(6) 0.0052(6) 0.0089(5) 0.0172(6) 
O6 0.0576(10) 0.0409(8) 0.0351(8) 0.0077(6) 0.0149(7) 0.0001(7) 
S1 0.0521(3) 0.0369(3) 0.0366(3) 0.0047(2) 0.0227(2) 0.0157(2) 
S2 0.0376(3) 0.0668(4) 0.0512(3) 0.0318(3) 0.0232(2) 0.0103(3) 
C1 0.0214(7) 0.0207(7) 0.0229(7) 0.0044(6) 0.0054(6) 0.0039(6) 
C2 0.0263(8) 0.0222(8) 0.0252(8) 0.0048(6) 0.0025(6) 0.0028(6) 
C3 0.0382(10) 0.0221(8) 0.0377(10) 0.0052(7) -0.0005(8) -0.0028(7) 
C4 0.0435(11) 0.0249(9) 0.0410(11) 0.0141(8) 0.0016(9) 0.0004(8) 
C5 0.0350(9) 0.0289(9) 0.0302(9) 0.0109(7) 0.0017(7) 0.0042(8) 
C6 0.0234(8) 0.0241(8) 0.0250(8) 0.0052(6) 0.0038(6) 0.0035(6) 
C7 0.0483(12) 0.0260(9) 0.0354(10) -0.0047(8) -0.0082(9) 0.0023(8) 
C8 0.0264(8) 0.0273(8) 0.0224(7) 0.0062(6) 0.0015(6) 0.0051(7) 
C9 0.0204(7) 0.0285(8) 0.0256(8) 0.0036(7) 0.0032(6) 0.0043(6) 
C10 0.0205(7) 0.0286(8) 0.0258(8) 0.0009(7) 0.0027(6) 0.0040(6) 
C11 0.0301(9) 0.0499(12) 0.0264(9) 0.0001(8) 0.0011(7) -0.0019(9) 
C12 0.0282(9) 0.0379(10) 0.0363(10) -0.0084(8) 0.0045(7) -0.0031(8) 
C13 0.0341(10) 0.0288(10) 0.0463(11) 0.0041(8) 0.0064(8) -0.0018(8) 
C14 0.0318(9) 0.0312(9) 0.0315(9) 0.0052(7) 0.0011(7) 0.0004(8) 
C15 0.0266(8) 0.0246(8) 0.0270(8) 0.0075(7) 0.0049(6) 0.0055(7) 
C16 0.0266(8) 0.0323(9) 0.0281(8) 0.0106(7) 0.0059(7) 0.0075(7) 
C17 0.0648(15) 0.0449(12) 0.0331(10) -0.0050(9) 0.0074(10) 0.0229(11) 
C18 0.0568(15) 0.0561(15) 0.0599(15) 0.0066(13) 0.0148(12) 0.0113(13) 
C30 0.0266(8) 0.0358(10) 0.0269(8) 0.0045(7) 0.0031(7) -0.0016(7) 
  
_geom_special_details 
; 
 All esds (except the esd in the dihedral angle between two l.s. planes) 
 are estimated using the full covariance matrix.  The cell esds are taken 
 into account individually in the estimation of esds in distances, angles 
 and torsion angles; correlations between esds in cell parameters are only 
 used when they are defined by crystal symmetry.  An approximate (isotropic) 
 treatment of cell esds is used for estimating esds involving l.s. planes. 
; 
  
loop_ 
 _geom_bond_atom_site_label_1 
 _geom_bond_atom_site_label_2 
 _geom_bond_distance 
 _geom_bond_site_symmetry_2 
 _geom_bond_publ_flag 
Yb1 O1 2.2423(12) . ? 
Yb1 O3 2.2685(12) . ? 
Yb1 O1 2.3007(11) 2_666 ? 
Yb1 N3 2.3439(16) . ? 
Yb1 O4 2.3448(13) . ? 
Yb1 N4 2.3551(15) . ? 
Yb1 O2 2.4413(13) 2_666 ? 
Yb1 N1 2.4665(14) . ? 
Yb1 C9 3.1384(17) . ? 
Yb1 C1 3.1758(16) 2_666 ? 
Yb1 Yb1 3.65883(14) 2_666 ? 
N1 C8 1.275(2) . ? 
N1 N2 1.392(2) . ? 
N2 C9 1.336(2) . ? 
N4 C15 1.159(2) . ? 
N3 C16 1.151(2) . ? 
O1 C1 1.342(2) . ? 
O1 Yb1 2.3007(11) 2_666 ? 
O2 C2 1.378(2) . ? 
O2 C7 1.435(2) . ? 
O2 Yb1 2.4413(13) 2_666 ? 
O3 C9 1.257(2) . ? 
O4 C17 1.435(2) . ? 
O6 C18 1.418(3) . ? 
S1 C15 1.6309(18) . ? 
S2 C16 1.6317(19) . ? 
C1 C2 1.410(2) . ? 
C1 C6 1.409(2) . ? 
C1 Yb1 3.1758(16) 2_666 ? 
C2 C3 1.379(3) . ? 
C3 C4 1.394(3) . ? 
C4 C5 1.373(3) . ? 
C5 C6 1.410(3) . ? 
C6 C8 1.450(2) . ? 
C9 C10 1.477(2) . ? 
C10 C30 1.391(3) . ? 
C10 C14 1.397(3) . ? 
C11 C12 1.382(3) . ? 
C11 C30 1.389(3) . ? 
C12 C13 1.380(3) . ? 
C13 C14 1.386(3) . ? 
  
loop_ 
 _geom_angle_atom_site_label_1 
 _geom_angle_atom_site_label_2 
 _geom_angle_atom_site_label_3 
 _geom_angle 
 _geom_angle_site_symmetry_1 
 _geom_angle_site_symmetry_3 
 _geom_angle_publ_flag 
O1 Yb1 O3 141.69(4) . . ? 
O1 Yb1 O1 72.72(5) . 2_666 ? 
O3 Yb1 O1 143.80(5) . 2_666 ? 
O1 Yb1 N3 125.89(5) . . ? 
O3 Yb1 N3 82.14(5) . . ? 
O1 Yb1 N3 80.59(5) 2_666 . ? 
O1 Yb1 O4 78.13(5) . . ? 
O3 Yb1 O4 88.03(5) . . ? 
O1 Yb1 O4 116.62(4) 2_666 . ? 
N3 Yb1 O4 73.21(5) . . ? 
O1 Yb1 N4 84.34(5) . . ? 
O3 Yb1 N4 85.01(5) . . ? 
O1 Yb1 N4 89.53(5) 2_666 . ? 
N3 Yb1 N4 142.25(6) . . ? 
O4 Yb1 N4 141.66(5) . . ? 
O1 Yb1 O2 131.21(4) . 2_666 ? 
O3 Yb1 O2 78.37(5) . 2_666 ? 
O1 Yb1 O2 66.12(4) 2_666 2_666 ? 
N3 Yb1 O2 72.08(5) . 2_666 ? 
O4 Yb1 O2 144.06(5) . 2_666 ? 
N4 Yb1 O2 70.62(5) . 2_666 ? 
O1 Yb1 N1 76.15(4) . . ? 
O3 Yb1 N1 65.62(5) . . ? 
O1 Yb1 N1 144.29(4) 2_666 . ? 
N3 Yb1 N1 133.06(5) . . ? 
O4 Yb1 N1 72.54(5) . . ? 
N4 Yb1 N1 70.25(5) . . ? 
O2 Yb1 N1 128.13(4) 2_666 . ? 
O1 Yb1 C9 122.91(4) . . ? 
O3 Yb1 C9 19.57(5) . . ? 
O1 Yb1 C9 154.94(4) 2_666 . ? 
N3 Yb1 C9 100.60(5) . . ? 
O4 Yb1 C9 87.21(5) . . ? 
N4 Yb1 C9 74.14(5) . . ? 
O2 Yb1 C9 90.23(4) 2_666 . ? 
N1 Yb1 C9 46.92(5) . . ? 
O1 Yb1 C1 94.39(4) . 2_666 ? 
O3 Yb1 C1 122.46(5) . 2_666 ? 
O1 Yb1 C1 21.69(4) 2_666 2_666 ? 
N3 Yb1 C1 67.28(5) . 2_666 ? 
O4 Yb1 C1 124.06(4) . 2_666 ? 
N4 Yb1 C1 90.82(5) . 2_666 ? 
O2 Yb1 C1 46.86(4) 2_666 2_666 ? 
N1 Yb1 C1 159.36(4) . 2_666 ? 
C9 Yb1 C1 136.96(4) . 2_666 ? 
O1 Yb1 Yb1 36.90(3) . 2_666 ? 
O3 Yb1 Yb1 171.25(3) . 2_666 ? 
O1 Yb1 Yb1 35.82(3) 2_666 2_666 ? 
N3 Yb1 Yb1 104.86(4) . 2_666 ? 
O4 Yb1 Yb1 98.96(4) . 2_666 ? 
N4 Yb1 Yb1 86.24(4) . 2_666 ? 
O2 Yb1 Yb1 98.58(3) 2_666 2_666 ? 
N1 Yb1 Yb1 111.34(3) . 2_666 ? 
C9 Yb1 Yb1 154.51(3) . 2_666 ? 
C1 Yb1 Yb1 57.49(3) 2_666 2_666 ? 
C8 N1 N2 116.10(14) . . ? 
C8 N1 Yb1 130.81(11) . . ? 
N2 N1 Yb1 112.54(10) . . ? 
C9 N2 N1 116.17(14) . . ? 
C15 N4 Yb1 176.76(15) . . ? 
C16 N3 Yb1 166.19(15) . . ? 
C1 O1 Yb1 133.68(10) . . ? 
C1 O1 Yb1 118.98(10) . 2_666 ? 
Yb1 O1 Yb1 107.29(5) . 2_666 ? 
C2 O2 C7 117.18(15) . . ? 
C2 O2 Yb1 114.48(10) . 2_666 ? 
C7 O2 Yb1 126.18(11) . 2_666 ? 
C9 O3 Yb1 123.22(12) . . ? 
C17 O4 Yb1 129.89(13) . . ? 
O1 C1 C2 117.80(14) . . ? 
O1 C1 C6 125.04(15) . . ? 
C2 C1 C6 117.13(15) . . ? 
O1 C1 Yb1 39.33(7) . 2_666 ? 
C2 C1 Yb1 80.82(10) . 2_666 ? 
C6 C1 Yb1 156.82(12) . 2_666 ? 
C3 C2 O2 123.79(16) . . ? 
C3 C2 C1 122.59(16) . . ? 
O2 C2 C1 113.61(15) . . ? 
C2 C3 C4 119.54(18) . . ? 
C5 C4 C3 119.51(18) . . ? 
C4 C5 C6 121.55(17) . . ? 
C5 C6 C1 119.59(16) . . ? 
C5 C6 C8 115.28(15) . . ? 
C1 C6 C8 125.12(16) . . ? 
N1 C8 C6 124.63(16) . . ? 
O3 C9 N2 119.41(16) . . ? 
O3 C9 C10 120.46(17) . . ? 
N2 C9 C10 120.13(16) . . ? 
O3 C9 Yb1 37.21(8) . . ? 
N2 C9 Yb1 83.28(10) . . ? 
C10 C9 Yb1 154.87(12) . . ? 
C30 C10 C14 119.62(17) . . ? 
C30 C10 C9 123.60(17) . . ? 
C14 C10 C9 116.77(16) . . ? 
C12 C11 C30 120.66(19) . . ? 
C11 C12 C13 120.00(18) . . ? 
C12 C13 C14 120.1(2) . . ? 
C13 C14 C10 120.10(18) . . ? 
N4 C15 S1 177.97(17) . . ? 
N3 C16 S2 179.30(18) . . ? 
C11 C30 C10 119.52(19) . . ? 
  
loop_ 
 _geom_torsion_atom_site_label_1 
 _geom_torsion_atom_site_label_2 
 _geom_torsion_atom_site_label_3 
 _geom_torsion_atom_site_label_4 
 _geom_torsion 
 _geom_torsion_site_symmetry_1 
 _geom_torsion_site_symmetry_2 
 _geom_torsion_site_symmetry_3 
 _geom_torsion_site_symmetry_4 
 _geom_torsion_publ_flag 
O1 Yb1 N1 C8 2.00(15) . . . . ? 
O3 Yb1 N1 C8 -175.59(17) . . . . ? 
O1 Yb1 N1 C8 31.87(19) 2_666 . . . ? 
N3 Yb1 N1 C8 -124.58(16) . . . . ? 
O4 Yb1 N1 C8 -79.69(16) . . . . ? 
N4 Yb1 N1 C8 90.90(16) . . . . ? 
O2 Yb1 N1 C8 133.99(15) 2_666 . . . ? 
C9 Yb1 N1 C8 177.36(18) . . . . ? 
C1 Yb1 N1 C8 66.5(2) 2_666 . . . ? 
Yb1 Yb1 N1 C8 13.32(16) 2_666 . . . ? 
O1 Yb1 N1 N2 -169.04(11) . . . . ? 
O3 Yb1 N1 N2 13.36(10) . . . . ? 
O1 Yb1 N1 N2 -139.18(10) 2_666 . . . ? 
N3 Yb1 N1 N2 64.37(13) . . . . ? 
O4 Yb1 N1 N2 109.27(11) . . . . ? 
N4 Yb1 N1 N2 -80.15(11) . . . . ? 
O2 Yb1 N1 N2 -37.05(13) 2_666 . . . ? 
C9 Yb1 N1 N2 6.31(9) . . . . ? 
C1 Yb1 N1 N2 -104.58(15) 2_666 . . . ? 
Yb1 Yb1 N1 N2 -157.73(9) 2_666 . . . ? 
C8 N1 N2 C9 175.40(15) . . . . ? 
Yb1 N1 N2 C9 -12.14(18) . . . . ? 
O1 Yb1 N4 C15 135(3) . . . . ? 
O3 Yb1 N4 C15 -8(3) . . . . ? 
O1 Yb1 N4 C15 -152(3) 2_666 . . . ? 
N3 Yb1 N4 C15 -78(3) . . . . ? 
O4 Yb1 N4 C15 73(3) . . . . ? 
O2 Yb1 N4 C15 -87(3) 2_666 . . . ? 
N1 Yb1 N4 C15 58(3) . . . . ? 
C9 Yb1 N4 C15 9(3) . . . . ? 
C1 Yb1 N4 C15 -130(3) 2_666 . . . ? 
Yb1 Yb1 N4 C15 172(3) 2_666 . . . ? 
O1 Yb1 N3 C16 -129.2(7) . . . . ? 
O3 Yb1 N3 C16 22.2(7) . . . . ? 
O1 Yb1 N3 C16 170.3(7) 2_666 . . . ? 
O4 Yb1 N3 C16 -68.1(7) . . . . ? 
N4 Yb1 N3 C16 93.5(7) . . . . ? 
O2 Yb1 N3 C16 102.5(7) 2_666 . . . ? 
N1 Yb1 N3 C16 -23.4(7) . . . . ? 
C9 Yb1 N3 C16 15.7(7) . . . . ? 
C1 Yb1 N3 C16 152.4(7) 2_666 . . . ? 
Yb1 Yb1 N3 C16 -163.1(7) 2_666 . . . ? 
O3 Yb1 O1 C1 -17.06(17) . . . . ? 
O1 Yb1 O1 C1 177.13(17) 2_666 . . . ? 
N3 Yb1 O1 C1 113.01(14) . . . . ? 
O4 Yb1 O1 C1 54.11(14) . . . . ? 
N4 Yb1 O1 C1 -91.60(14) . . . . ? 
O2 Yb1 O1 C1 -149.60(13) 2_666 . . . ? 
N1 Yb1 O1 C1 -20.59(14) . . . . ? 
C9 Yb1 O1 C1 -24.63(15) . . . . ? 
C1 Yb1 O1 C1 178.01(12) 2_666 . . . ? 
Yb1 Yb1 O1 C1 177.13(17) 2_666 . . . ? 
O3 Yb1 O1 Yb1 165.81(5) . . . 2_666 ? 
O1 Yb1 O1 Yb1 0.0 2_666 . . 2_666 ? 
N3 Yb1 O1 Yb1 -64.12(7) . . . 2_666 ? 
O4 Yb1 O1 Yb1 -123.02(6) . . . 2_666 ? 
N4 Yb1 O1 Yb1 91.27(6) . . . 2_666 ? 
O2 Yb1 O1 Yb1 33.27(7) 2_666 . . 2_666 ? 
N1 Yb1 O1 Yb1 162.28(6) . . . 2_666 ? 
C9 Yb1 O1 Yb1 158.24(4) . . . 2_666 ? 
C1 Yb1 O1 Yb1 0.88(5) 2_666 . . 2_666 ? 
O1 Yb1 O3 C9 -19.29(17) . . . . ? 
O1 Yb1 O3 C9 137.36(13) 2_666 . . . ? 
N3 Yb1 O3 C9 -160.54(14) . . . . ? 
O4 Yb1 O3 C9 -87.23(14) . . . . ? 
N4 Yb1 O3 C9 55.03(14) . . . . ? 
O2 Yb1 O3 C9 126.24(14) 2_666 . . . ? 
N1 Yb1 O3 C9 -15.52(13) . . . . ? 
C1 Yb1 O3 C9 142.82(13) 2_666 . . . ? 
Yb1 Yb1 O3 C9 55.9(3) 2_666 . . . ? 
O1 Yb1 O4 C17 85.70(19) . . . . ? 
O3 Yb1 O4 C17 -130.24(19) . . . . ? 
O1 Yb1 O4 C17 22.1(2) 2_666 . . . ? 
N3 Yb1 O4 C17 -47.86(19) . . . . ? 
N4 Yb1 O4 C17 150.36(18) . . . . ? 
O2 Yb1 O4 C17 -63.3(2) 2_666 . . . ? 
N1 Yb1 O4 C17 164.7(2) . . . . ? 
C9 Yb1 O4 C17 -149.81(19) . . . . ? 
C1 Yb1 O4 C17 -1.6(2) 2_666 . . . ? 
Yb1 Yb1 O4 C17 55.07(19) 2_666 . . . ? 
Yb1 O1 C1 C2 -155.03(12) . . . . ? 
Yb1 O1 C1 C2 21.84(19) 2_666 . . . ? 
Yb1 O1 C1 C6 26.8(2) . . . . ? 
Yb1 O1 C1 C6 -156.31(13) 2_666 . . . ? 
Yb1 O1 C1 Yb1 -176.87(18) . . . 2_666 ? 
C7 O2 C2 C3 -9.5(3) . . . . ? 
Yb1 O2 C2 C3 154.89(16) 2_666 . . . ? 
C7 O2 C2 C1 171.66(16) . . . . ? 
Yb1 O2 C2 C1 -24.00(18) 2_666 . . . ? 
O1 C1 C2 C3 -175.96(17) . . . . ? 
C6 C1 C2 C3 2.3(3) . . . . ? 
Yb1 C1 C2 C3 -162.15(18) 2_666 . . . ? 
O1 C1 C2 O2 2.9(2) . . . . ? 
C6 C1 C2 O2 -178.76(15) . . . . ? 
Yb1 C1 C2 O2 16.75(13) 2_666 . . . ? 
O2 C2 C3 C4 -178.91(18) . . . . ? 
C1 C2 C3 C4 -0.1(3) . . . . ? 
C2 C3 C4 C5 -0.9(3) . . . . ? 
C3 C4 C5 C6 -0.3(3) . . . . ? 
C4 C5 C6 C1 2.6(3) . . . . ? 
C4 C5 C6 C8 -176.36(19) . . . . ? 
O1 C1 C6 C5 174.68(16) . . . . ? 
C2 C1 C6 C5 -3.5(2) . . . . ? 
Yb1 C1 C6 C5 134.4(3) 2_666 . . . ? 
O1 C1 C6 C8 -6.5(3) . . . . ? 
C2 C1 C6 C8 175.34(16) . . . . ? 
Yb1 C1 C6 C8 -46.8(4) 2_666 . . . ? 
N2 N1 C8 C6 -178.20(15) . . . . ? 
Yb1 N1 C8 C6 11.0(3) . . . . ? 
C5 C6 C8 N1 166.81(18) . . . . ? 
C1 C6 C8 N1 -12.1(3) . . . . ? 
Yb1 O3 C9 N2 15.3(2) . . . . ? 
Yb1 O3 C9 C10 -164.23(11) . . . . ? 
N1 N2 C9 O3 -0.4(2) . . . . ? 
N1 N2 C9 C10 179.12(14) . . . . ? 
N1 N2 C9 Yb1 8.84(13) . . . . ? 
O1 Yb1 C9 O3 165.88(13) . . . . ? 
O1 Yb1 C9 O3 -70.83(18) 2_666 . . . ? 
N3 Yb1 C9 O3 19.61(15) . . . . ? 
O4 Yb1 C9 O3 91.95(14) . . . . ? 
N4 Yb1 C9 O3 -121.93(14) . . . . ? 
O2 Yb1 C9 O3 -52.19(14) 2_666 . . . ? 
N1 Yb1 C9 O3 160.50(16) . . . . ? 
C1 Yb1 C9 O3 -48.35(16) 2_666 . . . ? 
Yb1 Yb1 C9 O3 -162.97(11) 2_666 . . . ? 
O1 Yb1 C9 N2 -0.74(12) . . . . ? 
O3 Yb1 C9 N2 -166.6(2) . . . . ? 
O1 Yb1 C9 N2 122.55(12) 2_666 . . . ? 
N3 Yb1 C9 N2 -147.00(10) . . . . ? 
O4 Yb1 C9 N2 -74.67(10) . . . . ? 
N4 Yb1 C9 N2 71.45(10) . . . . ? 
O2 Yb1 C9 N2 141.20(10) 2_666 . . . ? 
N1 Yb1 C9 N2 -6.11(9) . . . . ? 
C1 Yb1 C9 N2 145.04(9) 2_666 . . . ? 
Yb1 Yb1 C9 N2 30.41(15) 2_666 . . . ? 
O1 Yb1 C9 C10 -160.6(3) . . . . ? 
O3 Yb1 C9 C10 33.5(2) . . . . ? 
O1 Yb1 C9 C10 -37.3(3) 2_666 . . . ? 
N3 Yb1 C9 C10 53.1(3) . . . . ? 
O4 Yb1 C9 C10 125.4(3) . . . . ? 
N4 Yb1 C9 C10 -88.4(3) . . . . ? 
O2 Yb1 C9 C10 -18.7(3) 2_666 . . . ? 
N1 Yb1 C9 C10 -166.0(3) . . . . ? 
C1 Yb1 C9 C10 -14.9(3) 2_666 . . . ? 
Yb1 Yb1 C9 C10 -129.5(2) 2_666 . . . ? 
O3 C9 C10 C30 -176.46(17) . . . . ? 
N2 C9 C10 C30 4.0(3) . . . . ? 
Yb1 C9 C10 C30 160.8(2) . . . . ? 
O3 C9 C10 C14 4.8(2) . . . . ? 
N2 C9 C10 C14 -174.76(16) . . . . ? 
Yb1 C9 C10 C14 -18.0(4) . . . . ? 
C30 C11 C12 C13 -0.5(3) . . . . ? 
C11 C12 C13 C14 0.2(3) . . . . ? 
C12 C13 C14 C10 0.3(3) . . . . ? 
C30 C10 C14 C13 -0.5(3) . . . . ? 
C9 C10 C14 C13 178.33(17) . . . . ? 
Yb1 N4 C15 S1 108(5) . . . . ? 
Yb1 N3 C16 S2 75(15) . . . . ? 
C12 C11 C30 C10 0.3(3) . . . . ? 
C14 C10 C30 C11 0.2(3) . . . . ? 
C9 C10 C30 C11 -178.52(17) . . . . ? 
  
_diffrn_measured_fraction_theta_max    0.972 
_diffrn_reflns_theta_full              28.45 
_diffrn_measured_fraction_theta_full   0.972 
_refine_diff_density_max    0.804 
_refine_diff_density_min   -0.477 
_refine_diff_density_rms    0.069 
